# Supplementary material for: Mitigation of cation exchange resin deactivation in the one-pot conversion of fructose to methyl levulinate
Source: Royal Society of Chemistry journal article supplement (doi:10.1039/d4cy00045e), 2024-01-01
Supplement: d4cy00045e1.pdf [file d4cy00045e1.pdf]

## SUPPORTING INFORMATION

### Mitigation of the cation exchange resins deactivation in the one pot conversion of fructose to methyl levulinate

Aymerick Beaurepaire,<sup>a,b</sup> Justine Bodin,<sup>b</sup> Delphine Dufour,<sup>b</sup> Quentin Blancart Remaury,<sup>a</sup> Stanislas Baudouin,<sup>b</sup> Karine de Oliveira Vigier<sup>a</sup> and François Jérôme<sup>a\*</sup>

#### 1. Chemicals

All reagents and solvent were used as received from commercial suppliers (unless otherwise indicated). All cation exchange resins have been kindly provided by SEPROSYS.

**Table S1.** List, purity and origin of chemicals used

| Name                    | CAS number | Purity | Supplier                    |
|-------------------------|------------|--------|-----------------------------|
| Fructose                | 57-48-7    | 99 %   | Sigma-Aldrich               |
| Methanol                | 67-56-1    | 97 %   | Carbo erba                  |
| Ethanol absolu          | 64-17-5    | 99%    | Carbo Erba                  |
| Butanol                 | 71-36-3    | 98%    | Sigma-Aldrich               |
| 5-Hydroxymethylfurfural | 67-47-0    | 99%    | Sigma-Aldrich               |
| Levulinic acid          | 123-76-2   | 98%    | Sigma-Aldrich               |
| 5-Methoxymethylfurfural | 1917-64-2  | 95%    | Manchester organics limited |
| Methyl levulinate       | 624-45-3   | 98%    | Sigma Aldrich               |
| Ethyl levulinate        | 539-88-8   | 99%    | Sigma Aldrich               |
| Butyl levulinate        | 2052-15-5  | 98%    | Sigma Aldrich               |
| Sulfuric acid           | 7664-93-9  | 96%    | Sigma Aldrich               |

**Table S2.** List and characterization of cation exchange resins studied in the main article

| Name                | Proton exchange capacity (mmol H <sup>+</sup> /g) | Matrix      | Humidity | Supplier |
|---------------------|---------------------------------------------------|-------------|----------|----------|
| Amberlyst® 45       | 2.95                                              | Macroporous | 51-55%   | Dow      |
| Amberlyst® 40       | 5.2                                               | Macroporous | 44-53%   | Dow      |
| Amberlyst® 31       | 4.8                                               | Gel         | 63-67%   | Dow      |
| Amberlyst® 35       | 5.4                                               | Macroporous | 52-57%   | Dow      |
| (WET)               |                                                   |             |          |          |
| Amberlyst® 36       | 5.40                                              | macroporous | 51-57%   | Dow      |
| (WET)               |                                                   |             |          |          |
| Amberlyst® 119      | 4.9                                               | Gel         | 49-55    | Dow      |
| Amberlyst® 16       | 4.7                                               | Macroporous | 52-58%   | Dow      |
| Amberlyst® 15       | 4.80                                              | Macroporous |          | Dow      |
| Purolite C124SH     | 5.01                                              | Gel         | 65-70%   | Purolite |
| Purolite CT251      | 5.2                                               | Macroporous | 54-59%   | Purolite |
| Purolite CT124      | 5.2                                               | Gel         | 60-65%   | Purolite |
| Treverlyst CAT400   | 3.00                                              | Macroporous | 45-55%   | Chemra   |
| Treverlite XS129700 | 2.46                                              | Macroporous | 45-55%   | Chemra   |
| Treverlite XS134400 | 3.91                                              | Macroporous | 52-58%   | Chemra   |

## 2. Analytical section

**<sup>1</sup>H NMR** was recorded on a Bruker Ultrashield 500 plus (500MHz). All spectra were internally referenced to residual proton solvent signals. Data for <sup>1</sup>H NMR are reported as chemical shift (δ ppm), multiplicity (s = singlet, d = doublet, t = triplet, q = quartet, quint = quintet, m = multiplet, br = broad signal), coupling constants (Hz) and integration.

**Gas chromatography (GC) analysis:** samples were analyzed on a Scion 436-GC equipped with a FID detector, a HP5MS column (30 m x 0.25 mm x 0.5 Micron, -60 to 325/350 °C) using with a flow front of 1 mL/min and with a split ratio of 40:1. The temperature at the injector is 275 °C and the injected volume is 5 µL. The heating ramp of the GC column was set as follow: 80°C to 100 °C (10°C/min), 1 min at 100°C, 100°C to 200°C (65°C/min), 1 min at 200°C, 200°C-300°C (10°C/min) and 1 min at 300°C.

**Ultra High Performance Liquid Chromatography (UHPLC) coupled to High Resolution Mass Spectrometry (HRMS):** UHPLC-HRMS analyses were performed at 30°C on a Thermo scientific Ultimate 3000 coupled with a Bruker impact HD Series Quadrupole-Time of Flight (QTOF) MS equipped with an Electrospray (ESI) ion source. The LC column was a Hypercarb, 50 x 2.1 mm using mixtures of ultra-pure water and acetonitrile, containing 0.1 % of formic acid, as a mobile phase (0.4 mL min<sup>-1</sup>). After injection of 10 µL of sample, the gradient was programmed as presented in Table S3.

**Table S3.** Program used for HPLC analysis

| Time (min) | %ultrapure water | % acetonitrile |
|------------|------------------|----------------|
| 0          | 1.0              | 99             |
| 2          | 1.0              | 99             |
| 6          | 40.0             | 60.0           |
| 7          | 60.0             | 40.0           |
| 12         | 100              | 0              |
| 16         | 100              | 0              |
| 16.01      | 1.0              | 99             |
| 20         | 1.0              | 99             |

For the HRMS, ESI source operated in positive polarity and its parameters were as follows: gas temperature 200 °C; drying gas 8.0 L min<sup>-1</sup>; nebulizer 2.1 Bar, capillary 2500 V; the mass range was from 50 to 1000 m/z. The ESI source operated also in negative polarity and its parameters were as follows: gas temperature 200 °C; drying gas 8.0 L min<sup>-1</sup>; nebulizer 2.1 Bar, capillary 3000 V; the mass range was from to 1000 m/z.

**High Performance Liquid Chromatography (HPLC):** HPLC analyses were performed on a Shimadzu LC -20ADSP at 40°C. The LC column was a ICSep ICE-COREGEL 107H column 300 x 7.8 mm using a 7 mM aqueous sulfuric acid solution as a mobile phase(flow of mobile phase: 0.8 mL.min<sup>-1</sup>). Detection by refractive index was performed on a Shimadzu RID-20A.

**Table S4.** HPLC retention times of reagents and products used in this work

| Reagent/product name      | Retention time |
|---------------------------|----------------|
| Levulinic acid            | 11.856         |
| Formic acid               | 10.500         |
| 5-(hydroxymethyl)furfural | 23.664         |
| Fructose                  | 8.100          |
| Methyl levulinate         | 18.864         |
| Methyl formate            | 10.516         |

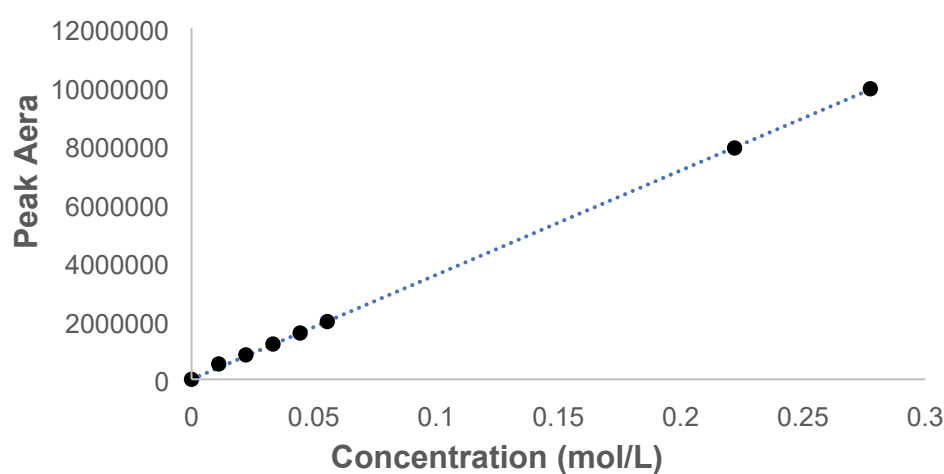**Figure S1** Calibration curve of fructose

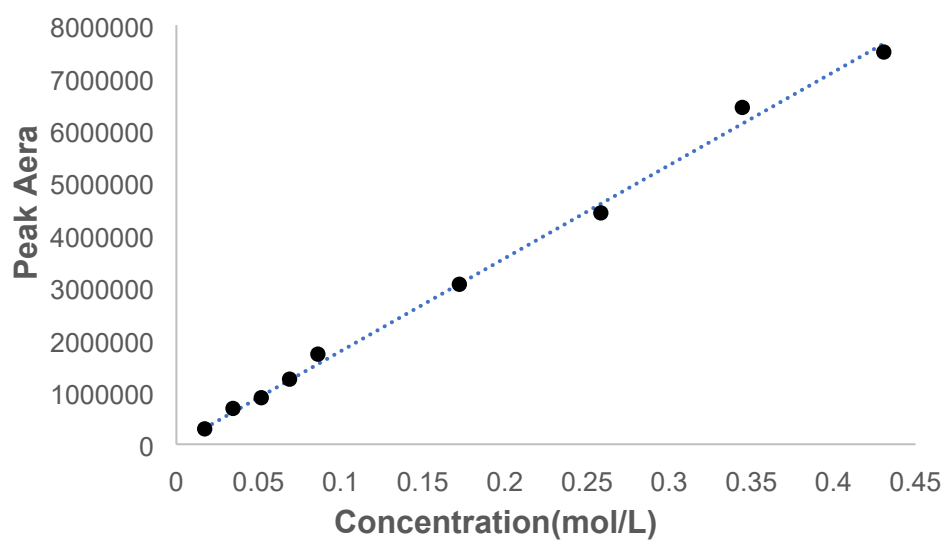

**Figure S2** Calibration curve of levulinic acid

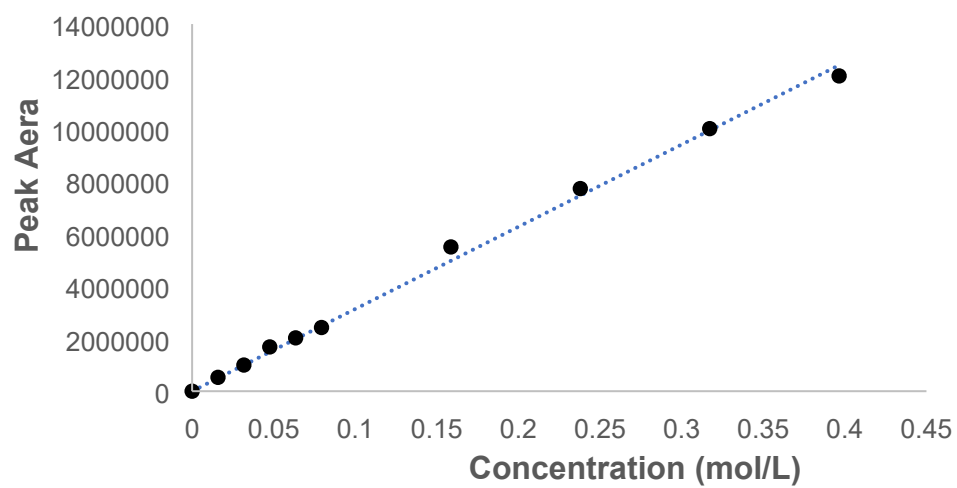

**Figure S3** Calibration curve of HMF

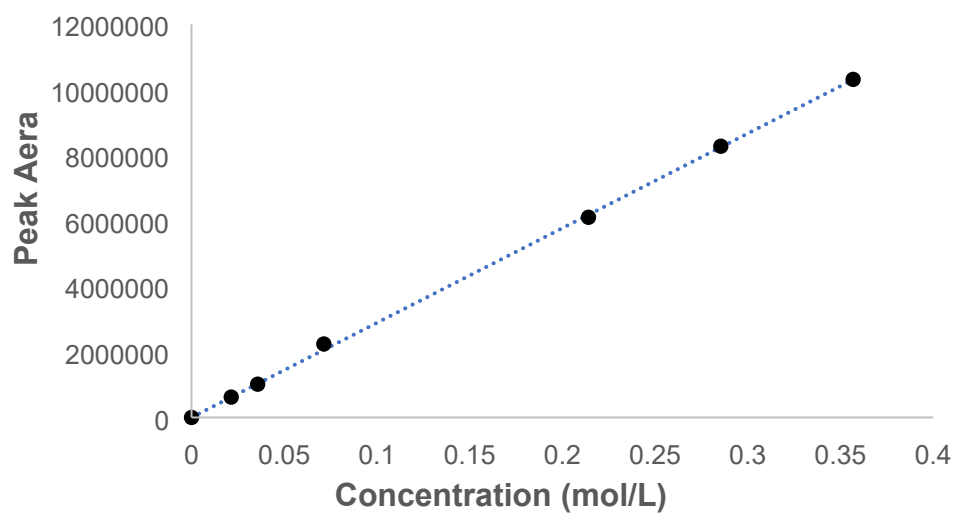

**Figure S4** Calibration curve of MMF

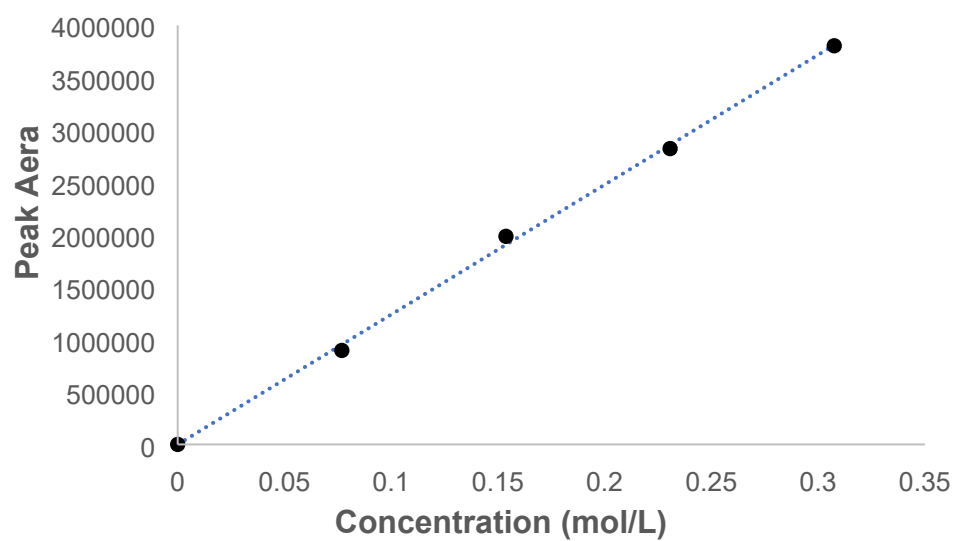

**Figure S5** Calibration curve of methyl levulinate

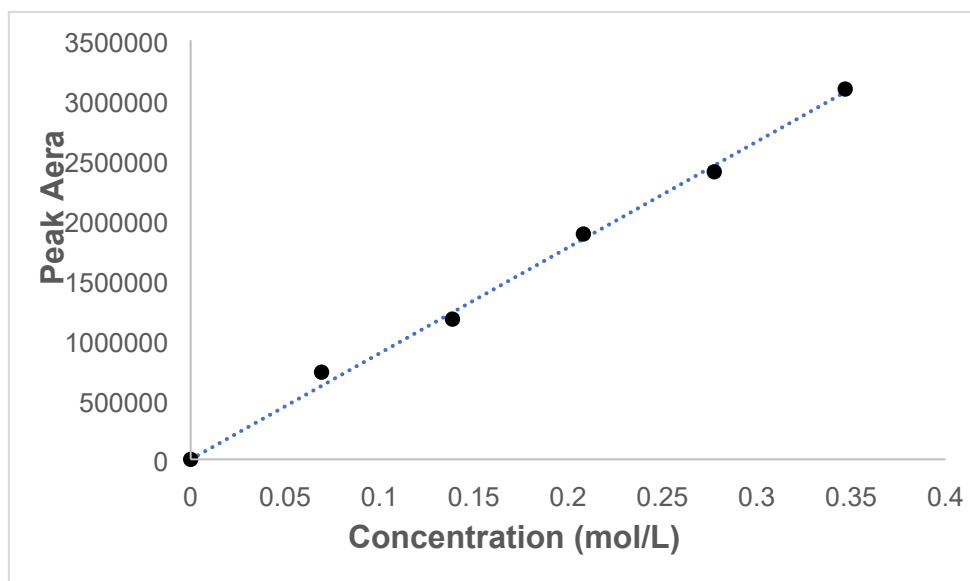

**Figure S6** Calibration curve of ethyl levulinate

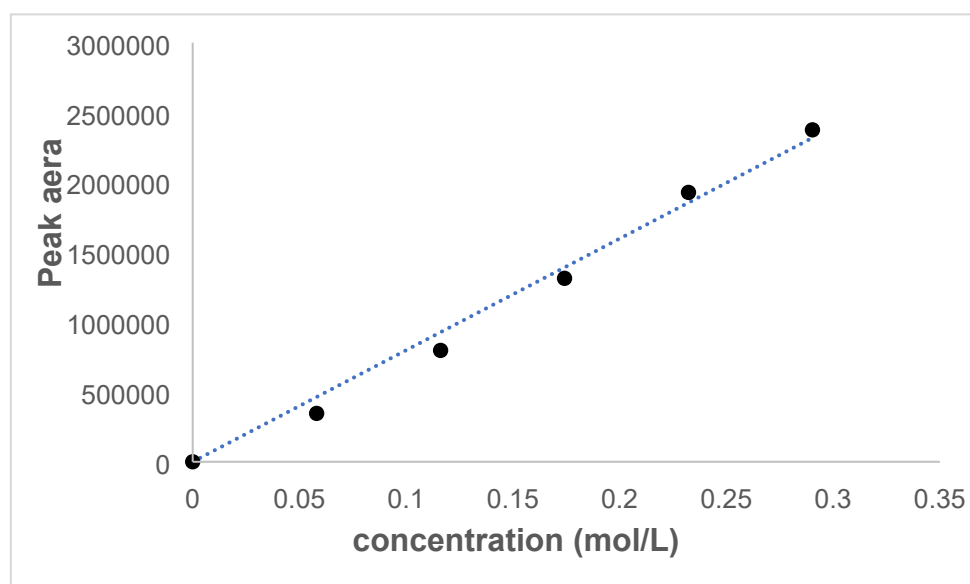

**Figure S7** Calibration curve of *n*-butyl levulinate

### **Solubility of fructose in alkyl alcohols**

The solubility of fructose in different alkyl alcohols (methanol, ethanol, and *n*-butanol) was determined by HPLC. Typically, 0.09g of fructose was added to 2 mL of the desired alkyl alcohols and stirred for 1 hour at 25°C with a magnetic stirring bar. The suspension was then filtered to remove the excess of undissolved fructose and the recovered solution was analyzed by HPLC to determine the amount of fructose solubilized (*i.e.* amount of fructose dissolved in 2 mL of alkyl alcohols)

**Acid-base titration of cation exchange resins:** 0.08 g of cation exchange resin was stirred for 2 hours in a 10 mL solution of 0.05 M sodium hydroxide. The cation exchange resin was then filtered and 5 mL of the alkaline solution was titrated with a 0.05 M aqueous HCl solution. The equivalent volume was used to determine the quantity of acid site per gram of (dry) cation exchange resin.

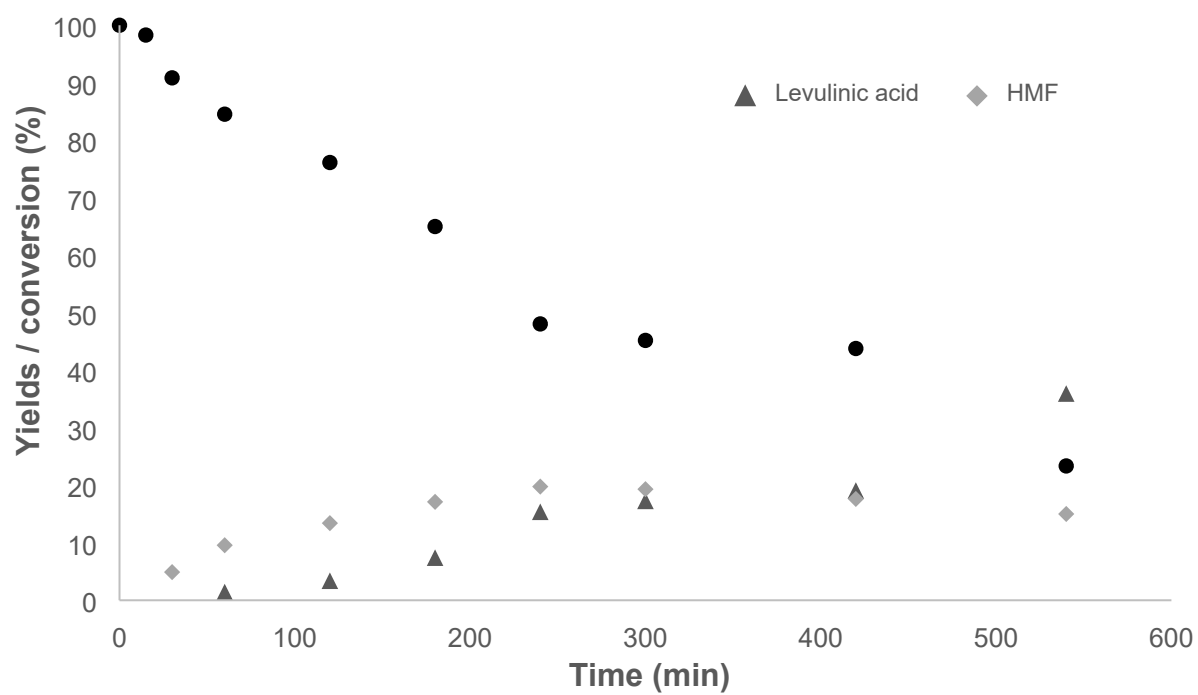

**Figure S8** Plot of the fructose conversion and levulinic acid/HMF yield as a function of the reaction time in the presence of 0.665M H<sub>2</sub>SO<sub>4</sub> (100°C, 5 wt% fructose in water)

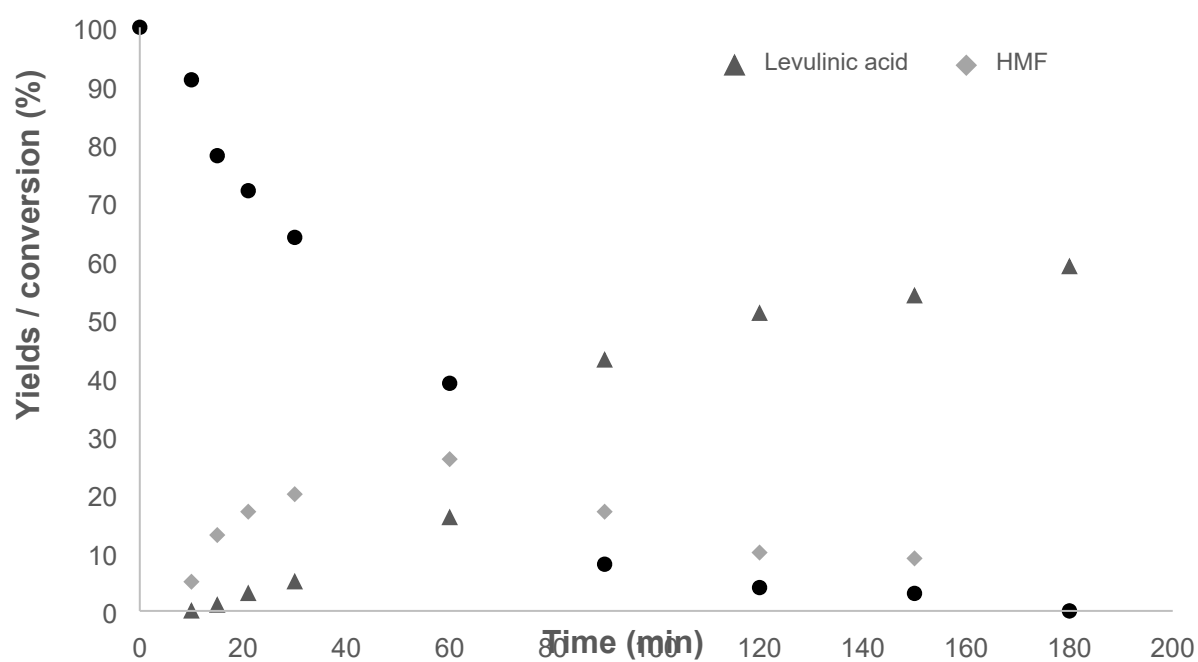

**Figure S9** Plot of the fructose conversion and levulinic acid/HMF yield as a function of the reaction time in the presence of 0.665M H<sub>2</sub>SO<sub>4</sub> (120°C, 5 wt% fructose in water)

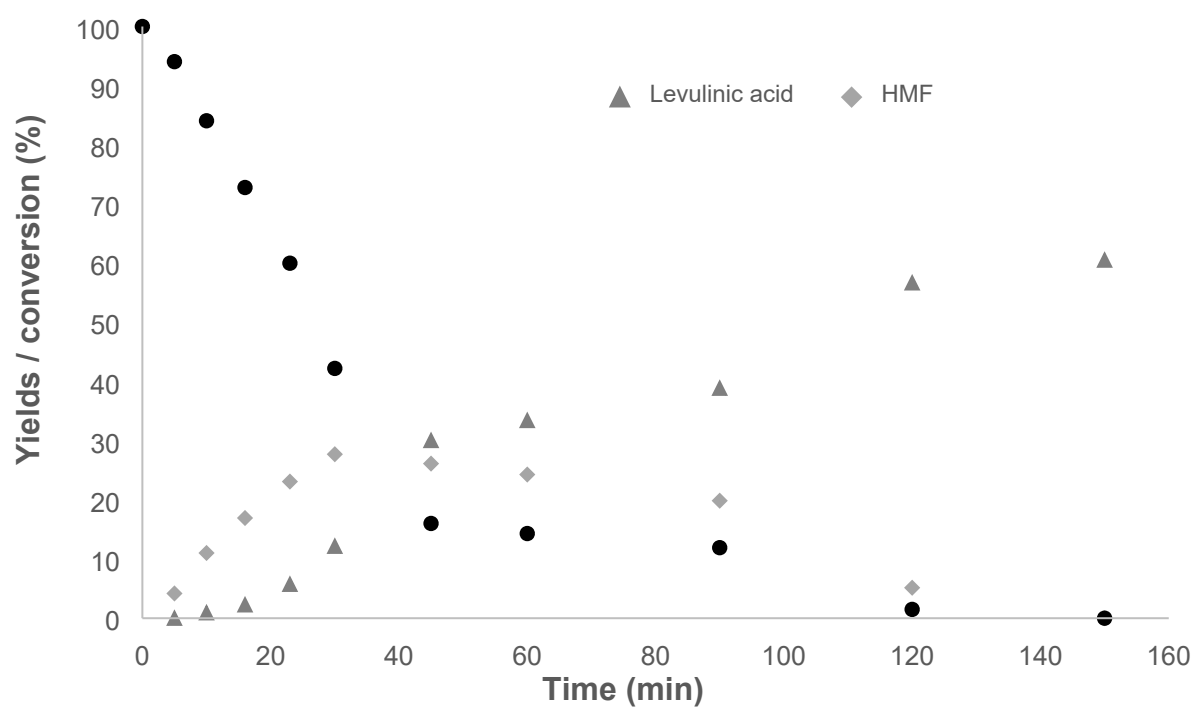

**Figure S10** Plot of the fructose conversion and levulinic acid/HMF yield as a function of the reaction time in the presence of 0.665M H<sub>2</sub>SO<sub>4</sub> (130°C, 5 wt% fructose in water)

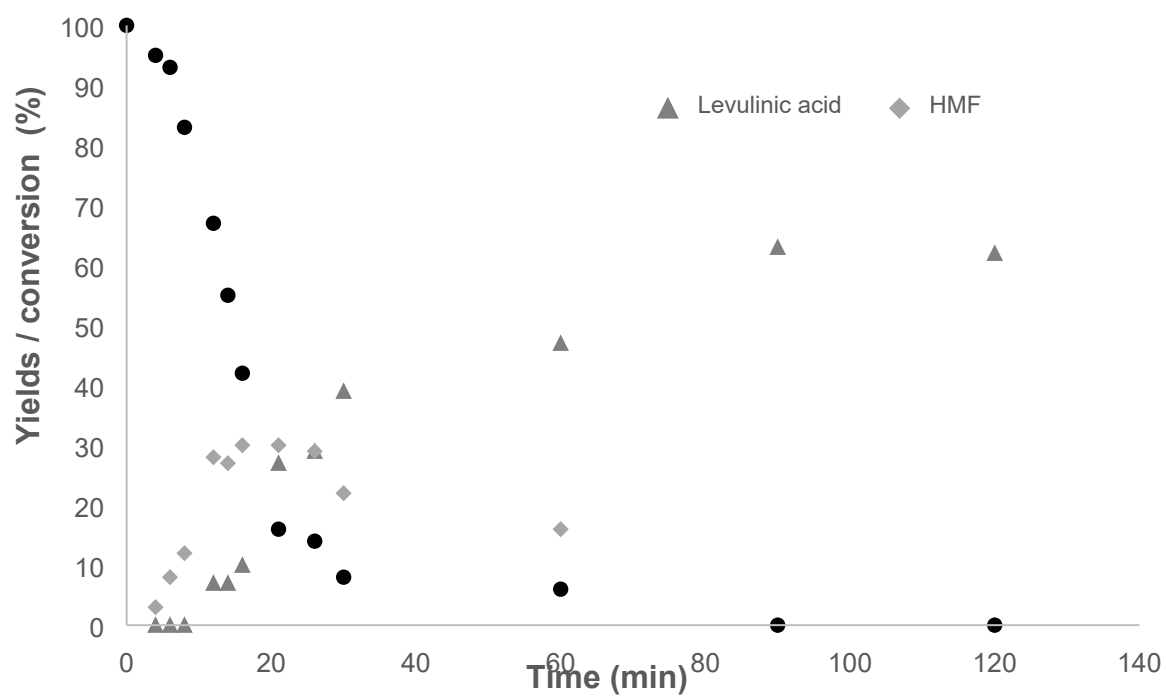

**Figure S11** Plot of the fructose conversion and levulinic acid/HMF yield as a function of the reaction time in the presence of 0.665M H<sub>2</sub>SO<sub>4</sub> (140°C, 5 wt% fructose in water)

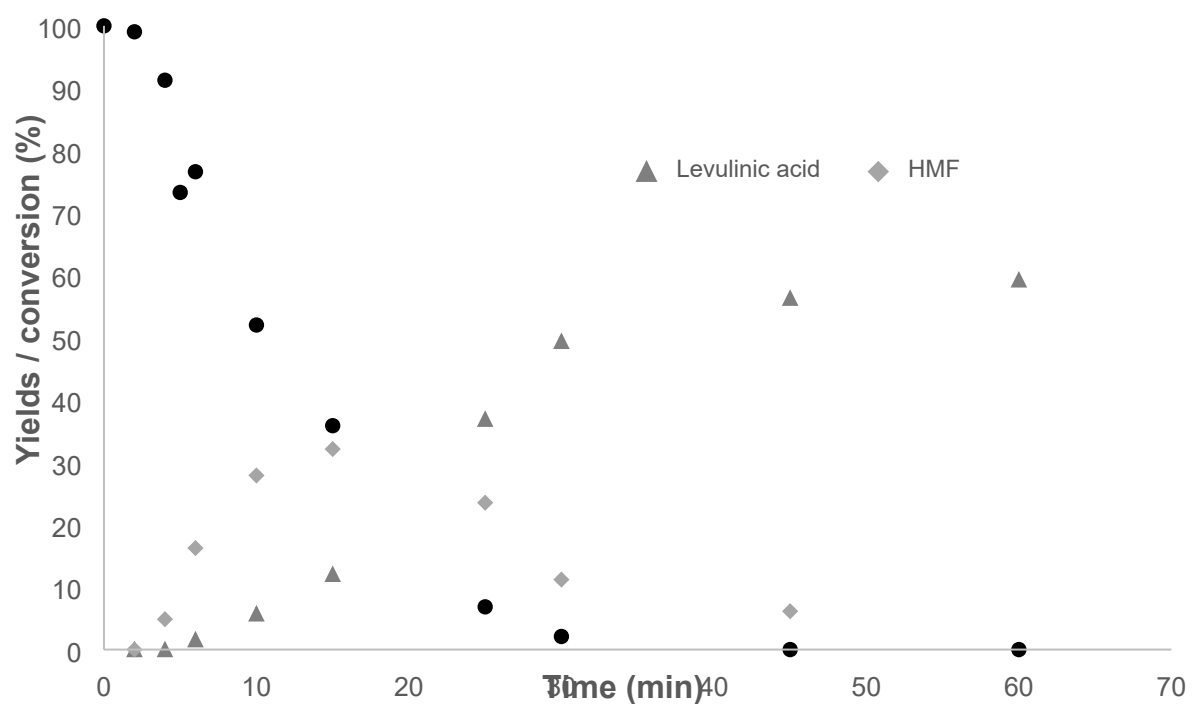

**Figure S12** Plot of the fructose conversion and levulinic acid/HMF yield as a function of the reaction time in the presence of 0.665M  $\text{H}_2\text{SO}_4$  (150°C, 5 wt% fructose in water)

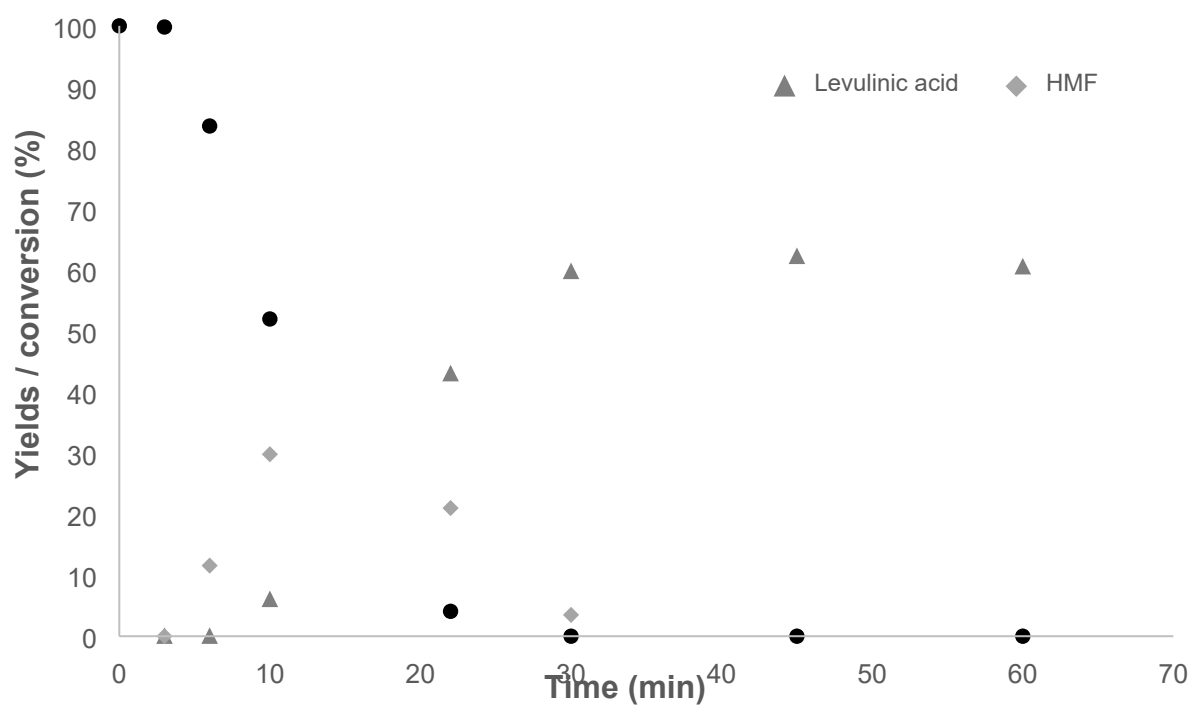

**Figure S13** Plot of the fructose conversion and levulinic acid/HMF yield as a function of the reaction time in the presence of 0.665M H<sub>2</sub>SO<sub>4</sub> (160°C, 5 wt% fructose in water)

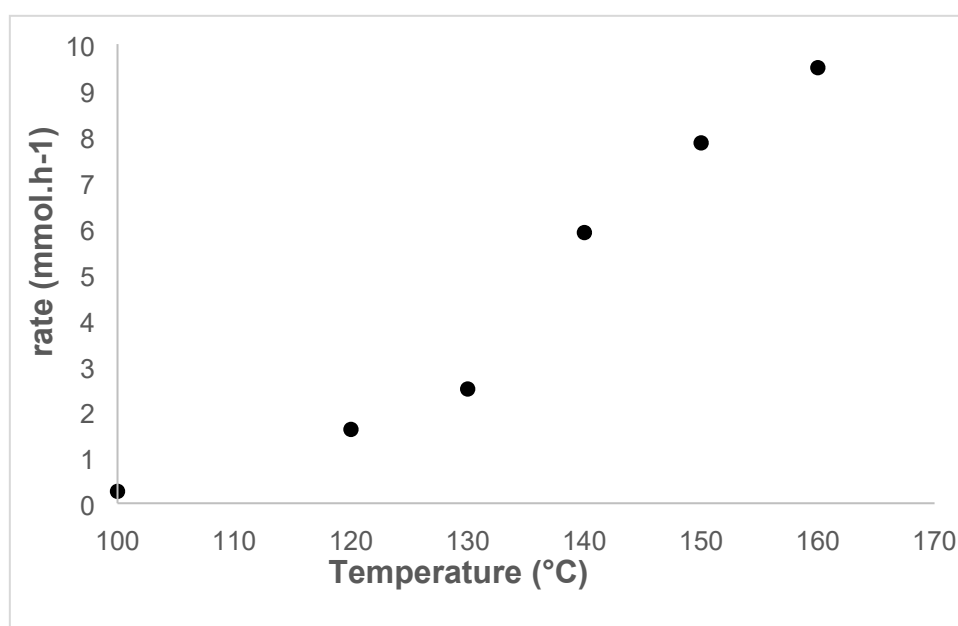

**Figure S14** plot of the reaction rate as a function of the reaction temperature (5 wt% fructose in water)

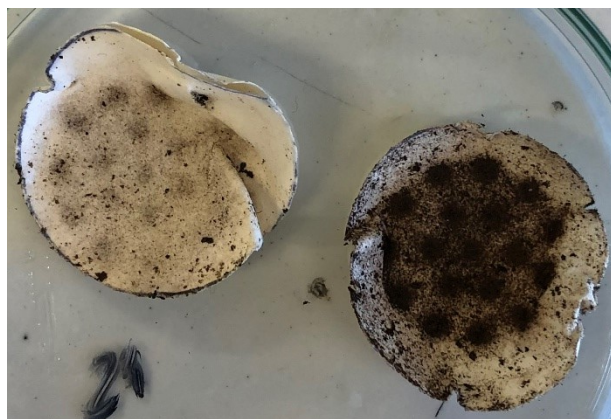

**Figure S15.** Photo of humins filtrated at 100°C (left, 40% conv. of fructose) and 140°C (right, 20% conv. of fructose)

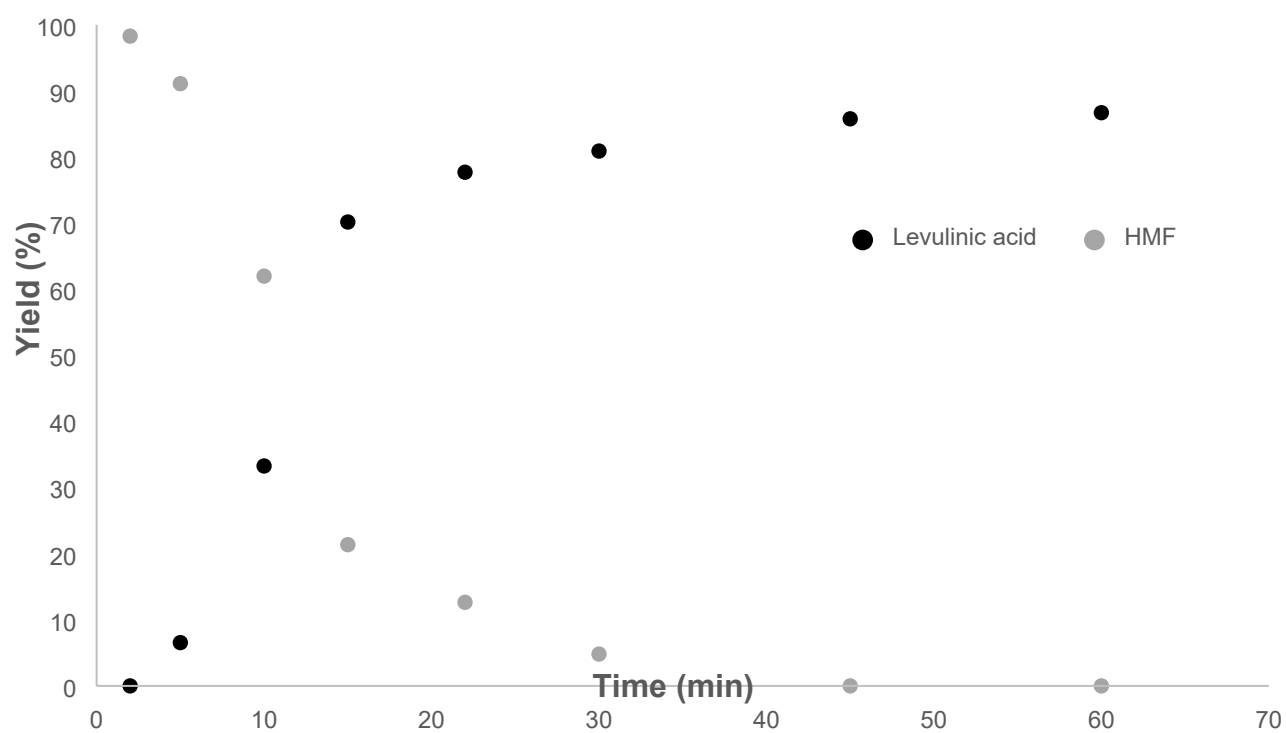

**Figure S16** Plot of the HMF conversion and LA yield as a function of the reaction time in the presence of 0.665M H<sub>2</sub>SO<sub>4</sub> (160°C, 5 wt% HMF in water)

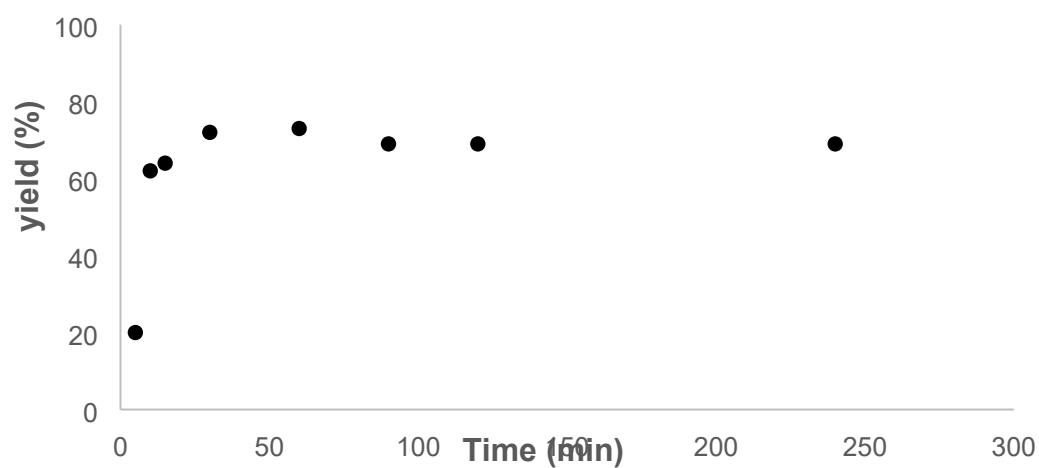

**Figure S17** Plot of the ethyl levulinate yield as a function of the reaction time (160°C, 5 wt% of fructose in a 0.065 M ethanolic solution of H<sub>2</sub>SO<sub>4</sub>)

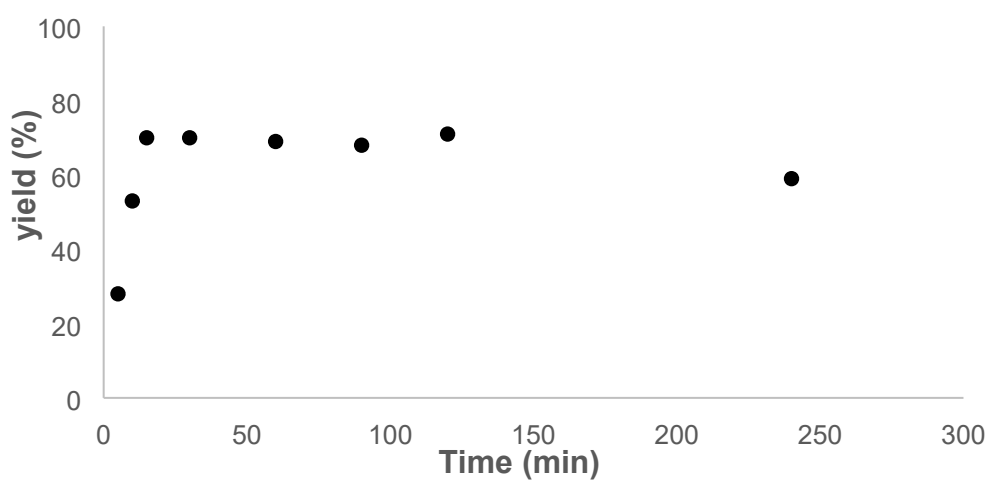

**Figure S18** Plot of the *n*-butyl levulinate yield as a function of the reaction time (160°C, 5 wt% of fructose in a 0.065 M *n*-butanolic solution of H<sub>2</sub>SO<sub>4</sub>)

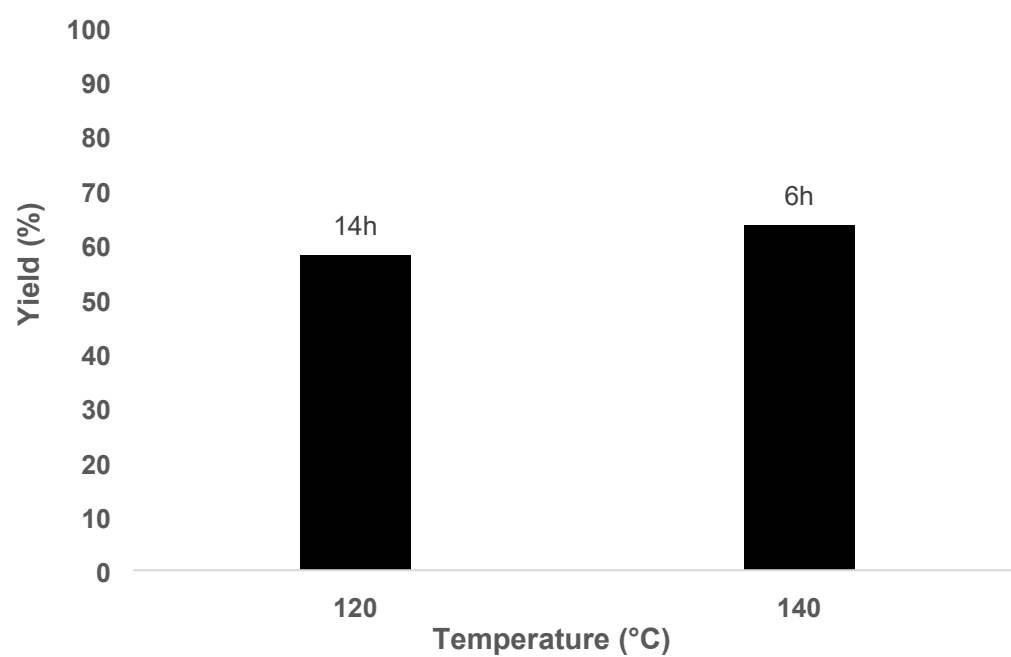

**Figure S19** Yield in LA at 120 and 140°C (5 wt% fructose in water)

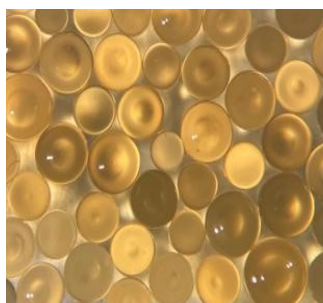

5 min LA yield : 0 %

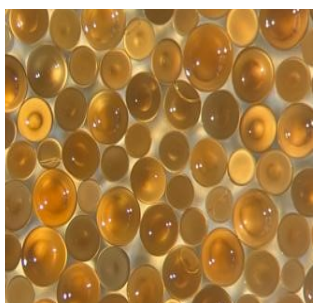

10 min LA yield : 0%

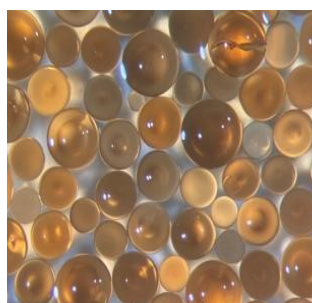

15 min LA yield : 2%

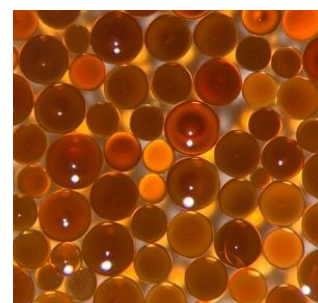

30 min LA yield : 10%

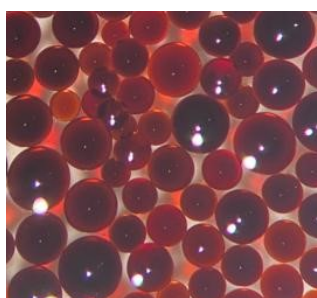

1 h LA yield : 23%

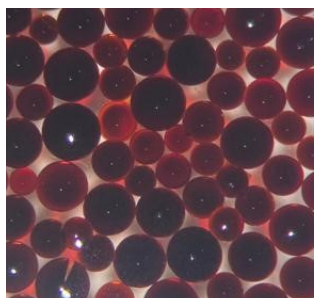

2 h LA yield : 44%

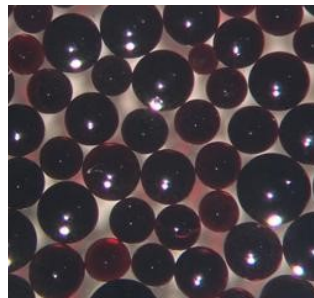

3 h LA yield : 61%

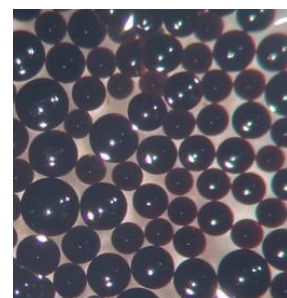

4 h LA yield : 66%

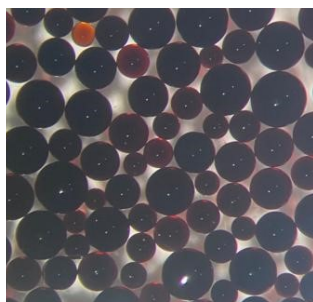

5 h LA yield : 70%

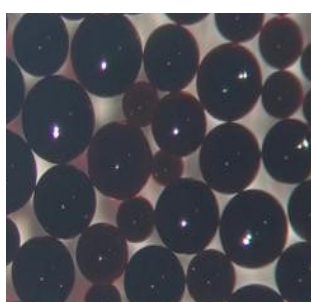

6 h LA yield : 64%

**Figure S20** Visual aspect of the Purolite C124-SH as a function of the reaction time in water (140°C, 5 wt% in water)

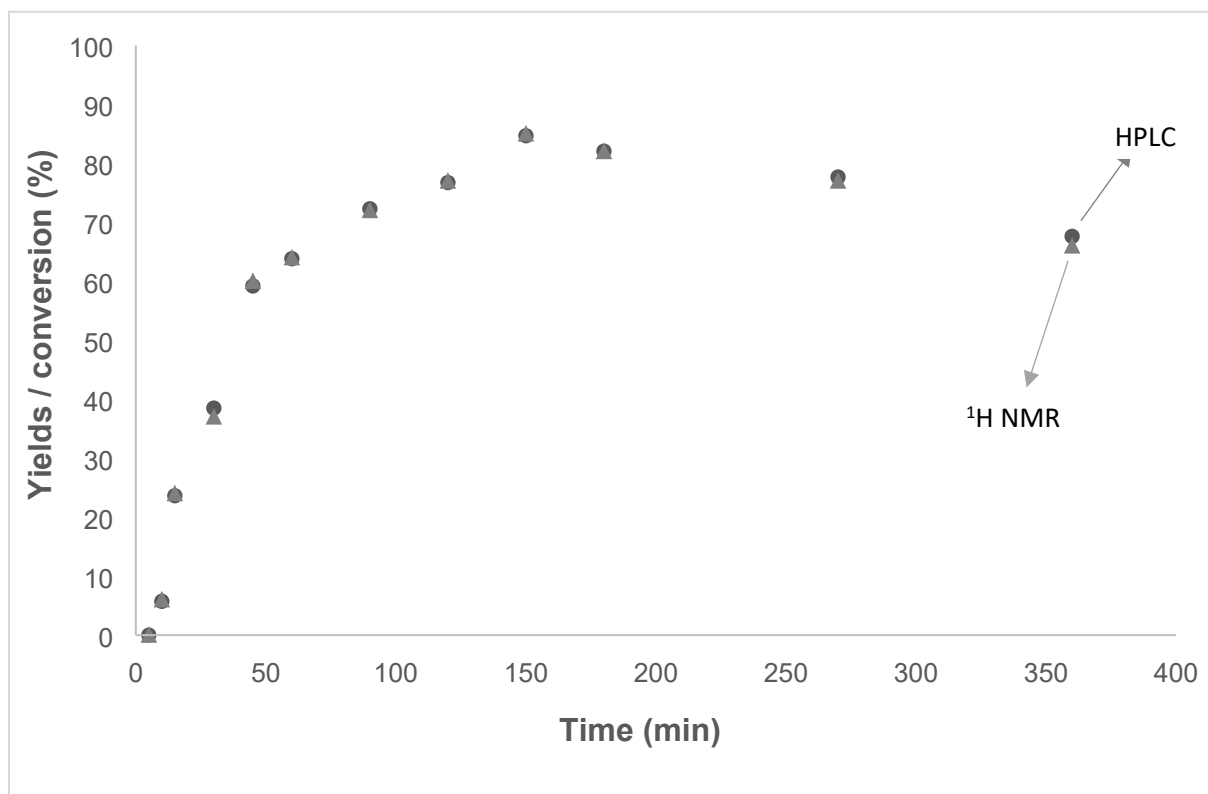

**Figure S21** Plot of the methyl levulinate yield as a function of the reaction time in the presence of Purolite C124 SH followed by HPLC and <sup>1</sup>H NMR (circle HPLC and triangle <sup>1</sup>H NMR) (160°C, 5 wt% fructose in methanol)

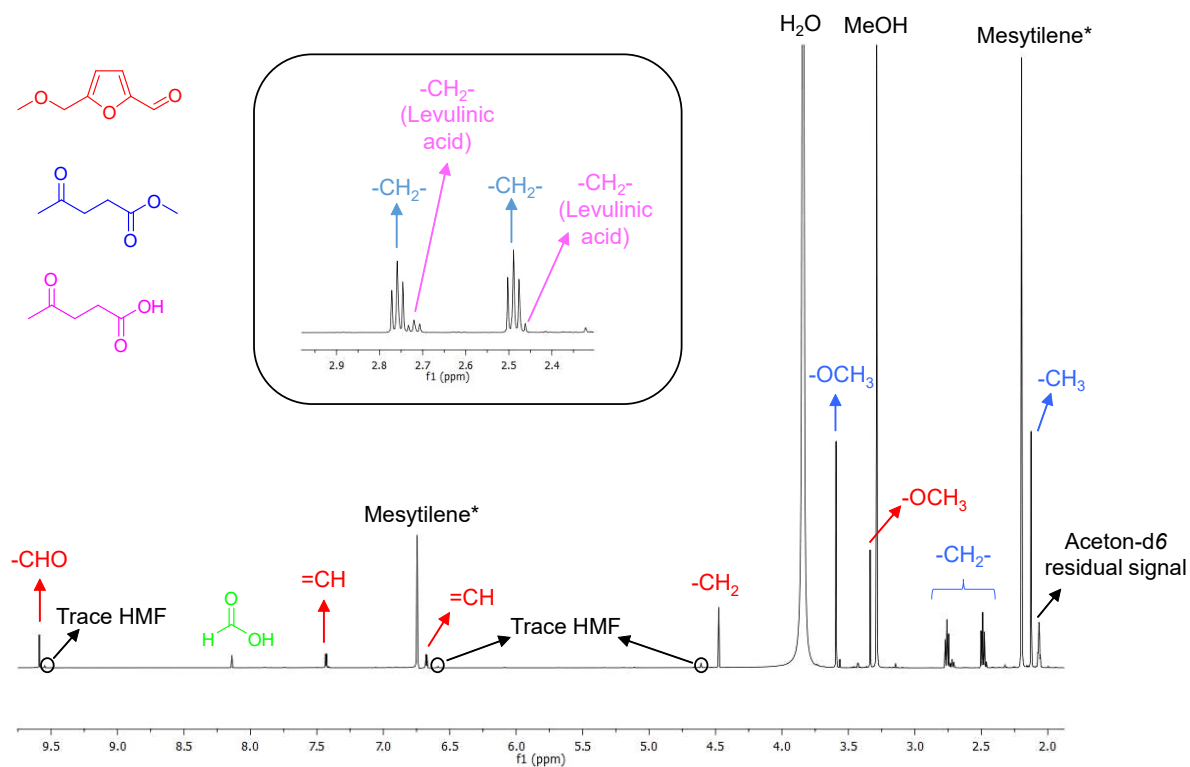

\* Mesitylene was used as an internal standard

**Figure S22**  $^1\text{H}$  NMR of the crude reaction media in  $(\text{CD}_3)_2\text{CO}$  (methyl formate was removed during the distillation of methanol under vacuum and was thus not present on the  $^1\text{H}$  NMR spectrum).  $^1\text{H}$  NMR collected after 1h of reaction (5 wt% fructose in methanol,  $160^\circ\text{C}$ , Purolite C124 SH ( $0.05 \text{ mmol H}^+$ )).

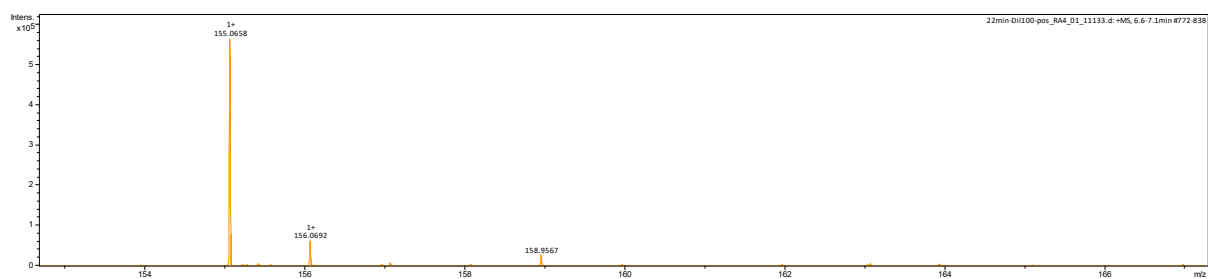

**Figure S23.** Mass spectrum of the suspected ester between HMF and formic acid (positive mode  $m/z=155.0657$  amu  $[M+H]^+$ ).

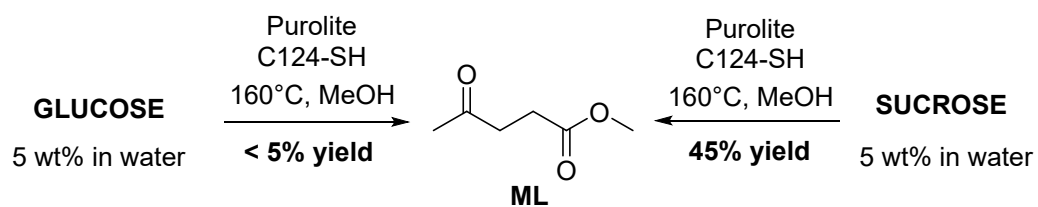

**Figure S24:** Transposition to glucose and sucrose (5 wt% sugar in MeOH, 160°C, 5 mmol H<sup>+</sup> Purolite C124 SH)

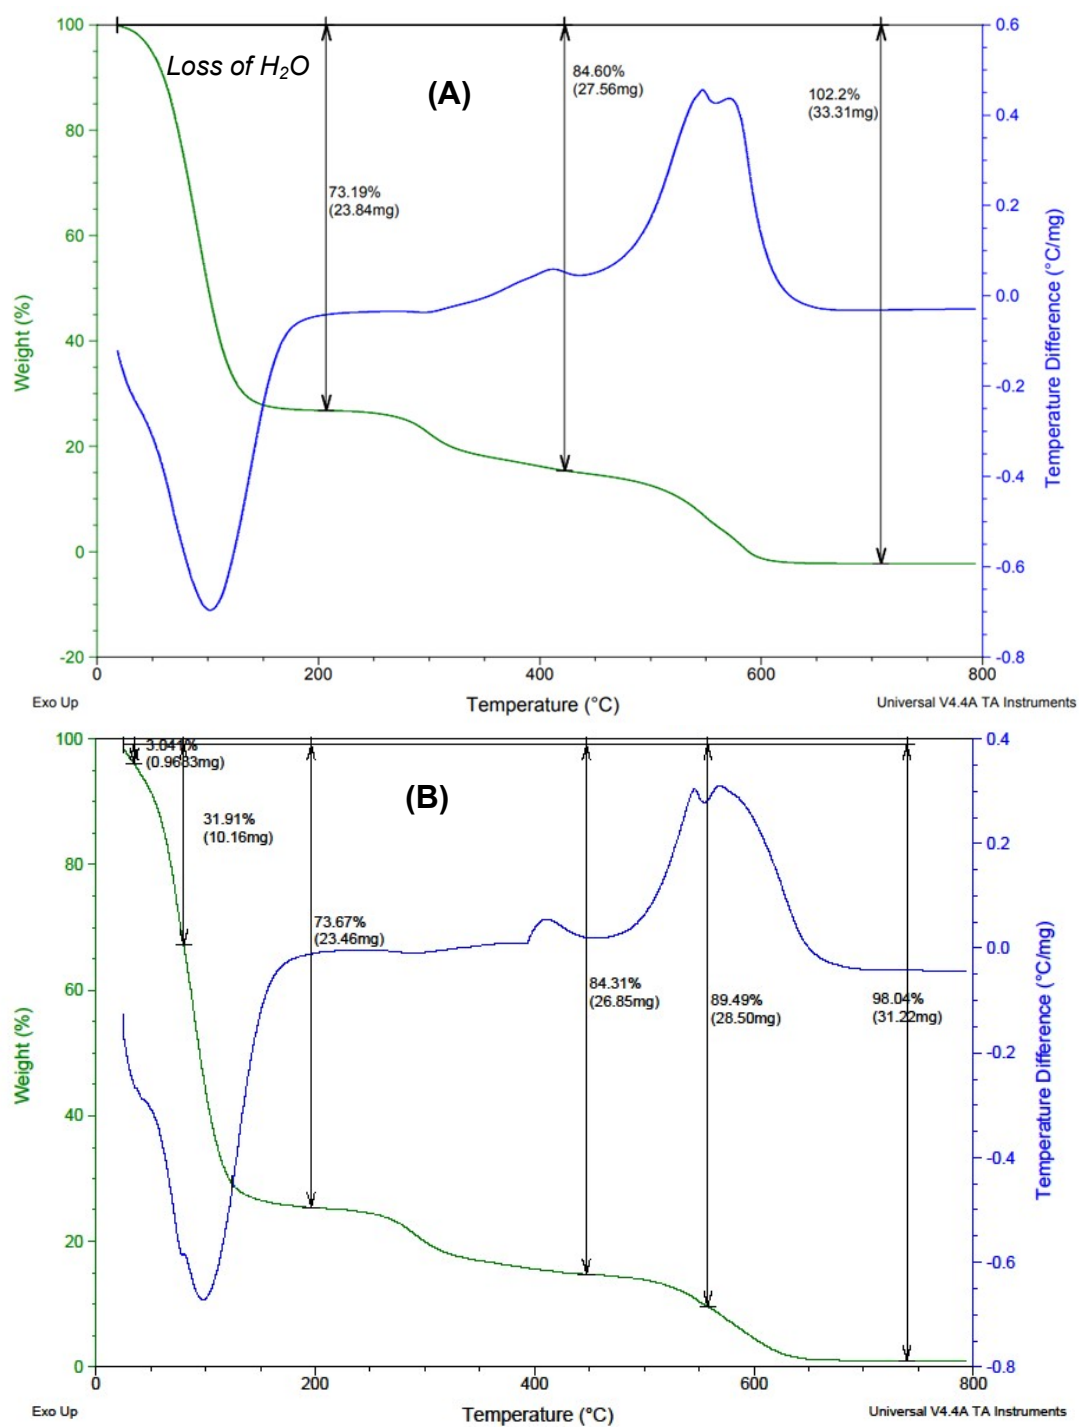

**Figure S25:** TDA/TGA of (A) fresh and (B) spent Purolite C124 SH performed un air (heating ramp 10°C/min, air flow 100 mL/min)

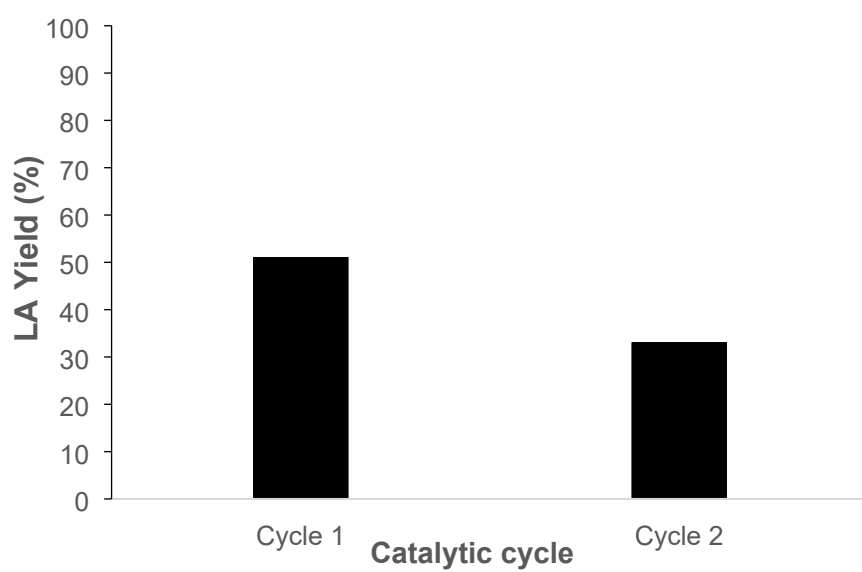

**Figure S26** Catalytic recycling of the Amberlyst 119 at 140°C in water (5 wt% fructose, 2 h)

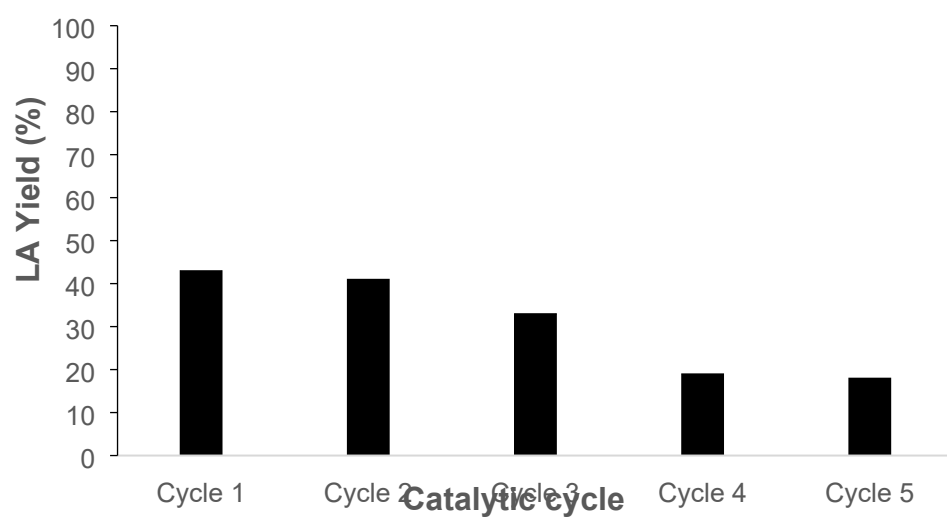

**Figure S27** Catalytic recycling of the Amberlyst 16 at 140°C in water (5 wt% fructose, 2 h)

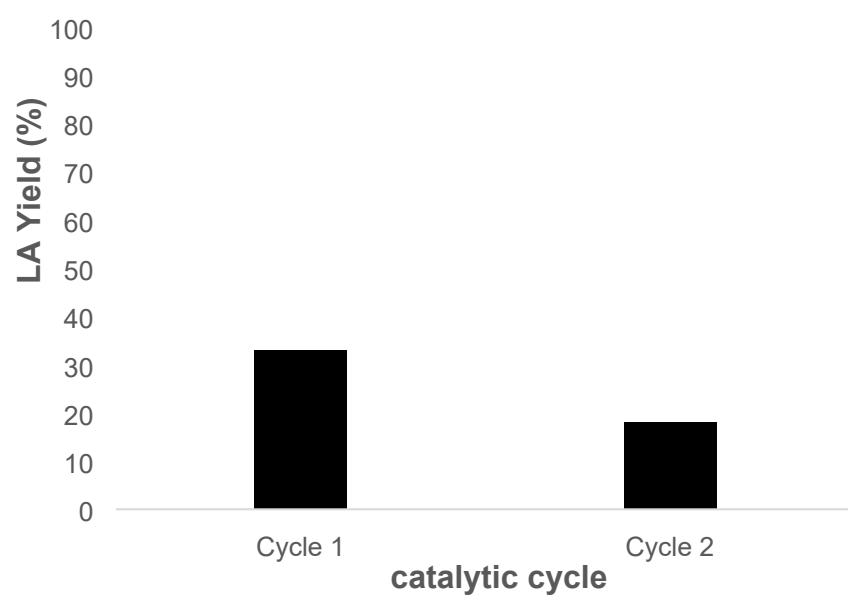

**Figure S28** Catalytic recycling of the Amberlyst 36 at 140°C in water (5 wt% fructose, 2 h)

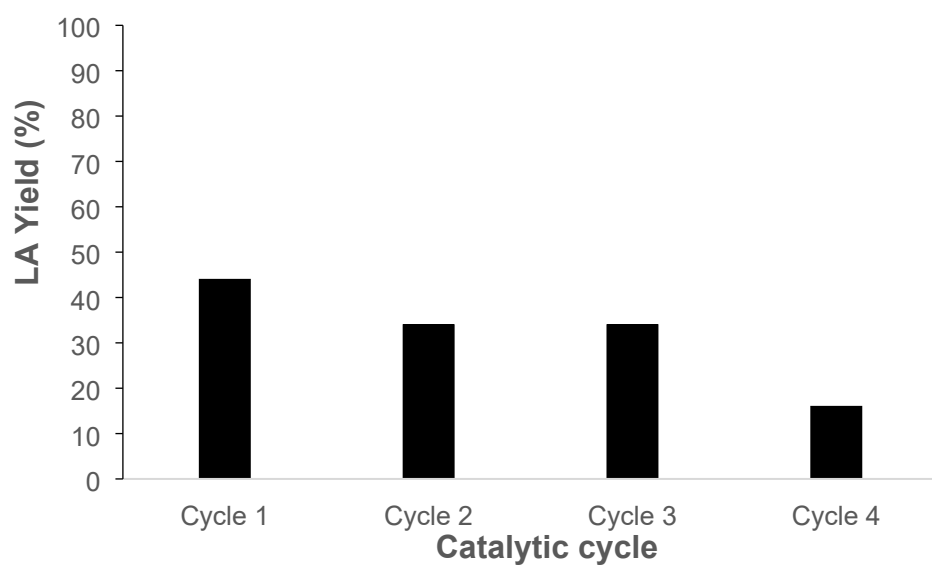

**Figure S29** Catalytic recycling of the Amberlyst 45 at 140°C in water (5 wt% fructose, 2 h)

**Note:** Unfortunately, it was not possible to test the recycling of the Amberlyst 31 cation exchange resin mentioned in the article text. Indeed, Amberlyst 31 was mechanically not stable in water in our conditions, it was rapidly crushed during the stirring once the first catalytic cycle.

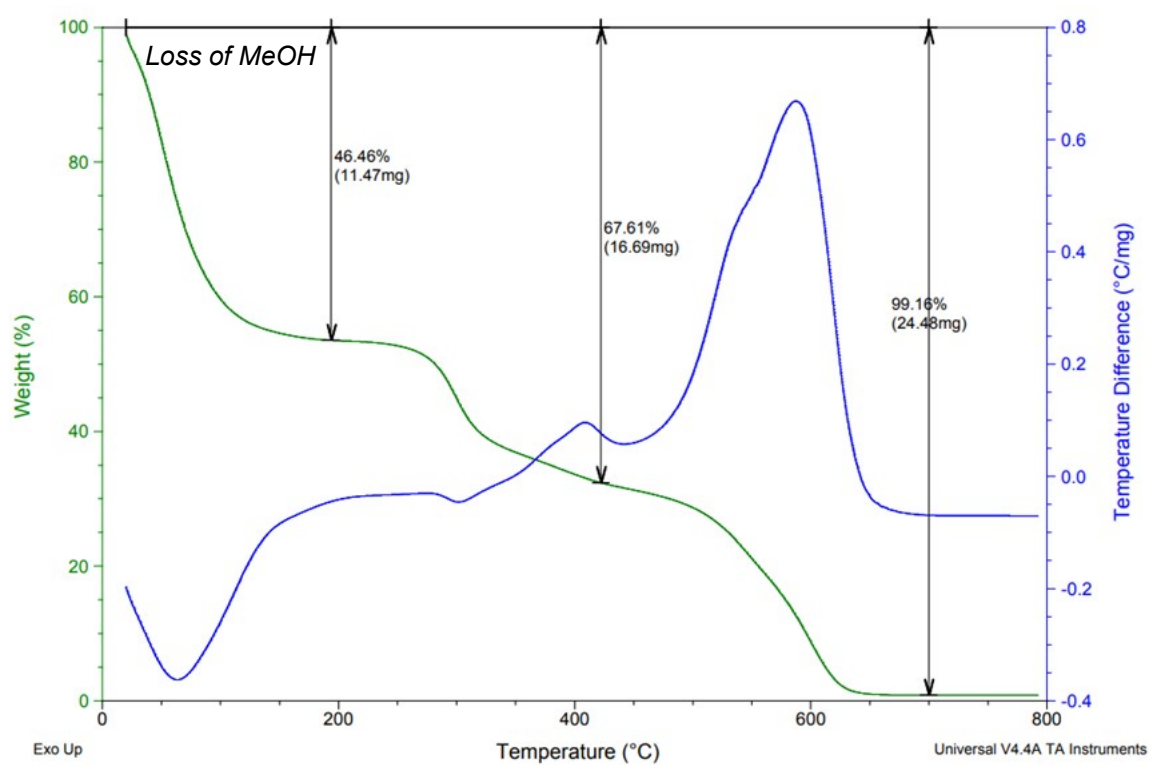

**Figure S30:** TDA/TGA of Purolite C124 SH after several washing with methanol (heating ramp 10°C/min, air flow 100 mL/min).

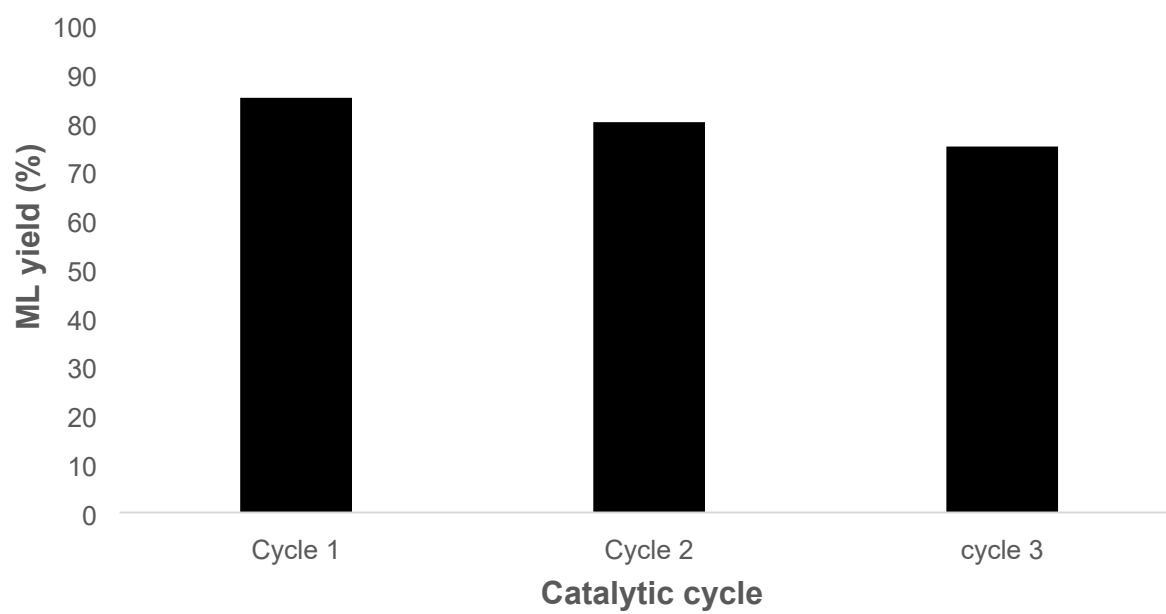

**Figure S31** Recycling of Purolite C124-SH after re-hydration between each cycle (magnetic stirring)

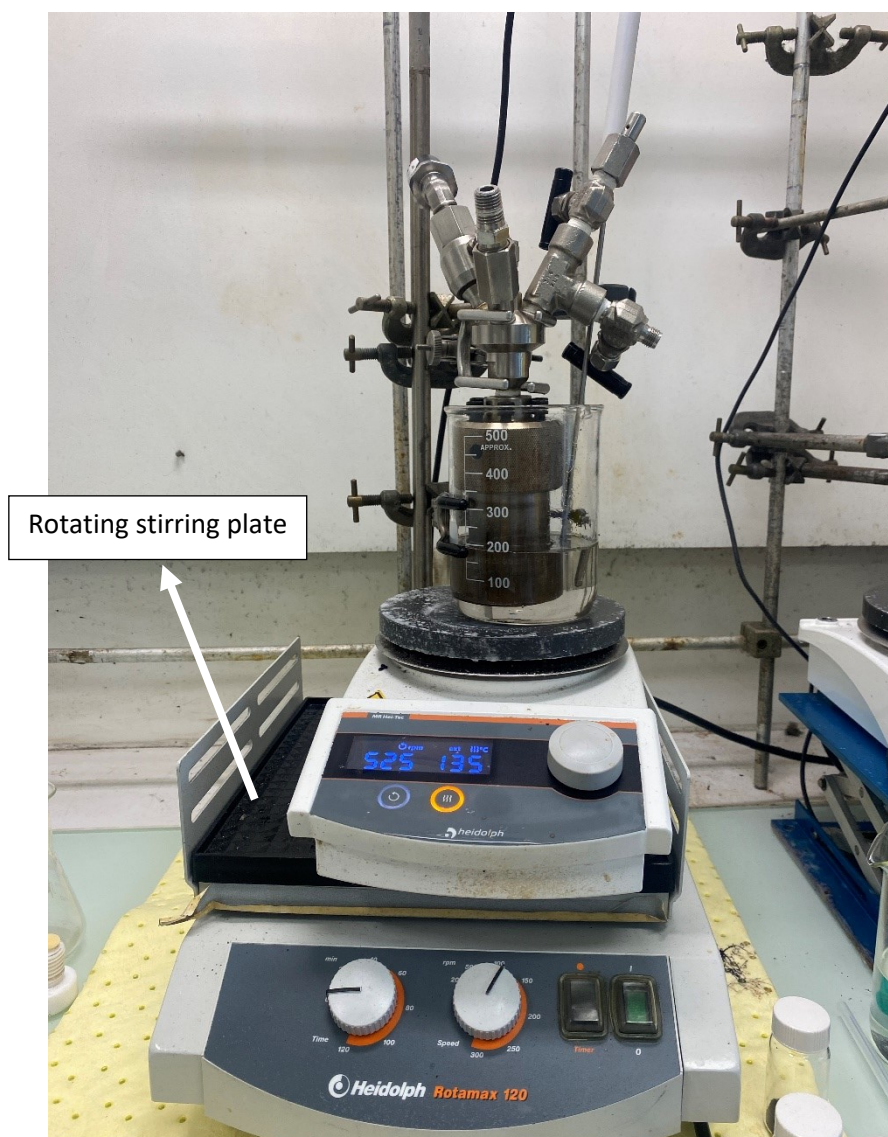

**Figure S32.** Photo of the orbital stirring

## Characterization of the reaction products

### Methyl levulinate

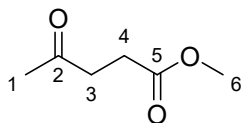

<sup>1</sup>H NMR (500 MHz, d<sub>6</sub>-Acetone) δ 3.60 (s, 3H), 2.75 (t, 2H), 2.49 (t, 2H), 2.12 (s, 3H).

<sup>13</sup>C NMR (125 MHz, d<sub>6</sub>-Acetone) δ 206.5, 173.5, 51.7, 38.2, 29.6, 28.2.

UHPLC-HRMS: m/z calculated for C<sub>6</sub>H<sub>11</sub>O<sub>3</sub> [M+H]<sup>+</sup> 131.0630, found 131.0727.

### 5-(methoxymethyl)furfural

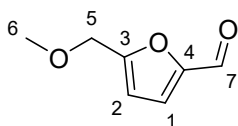

<sup>1</sup>H NMR (500 MHz, d<sub>6</sub>-Acetone) δ 9.62 (s, 1H), 7.40 (d, *J* = 3.5 Hz, 1H), 6.66 (d, *J* = 3.5 Hz, 1H), 4.48 (s, 2H), 3.34 (s, 3H).

<sup>13</sup>C NMR (125 MHz, d<sub>6</sub>-Acetone) δ 178.3, 159.1, 153.7, 123.4, 112.2, 66.7, 58.1

UHPLC-HRMS: m/z calculated for C<sub>7</sub>H<sub>8</sub>O<sub>3</sub> [M+H]<sup>+</sup> 141.0473, found 141.0546.

### 5-(hydroxymethyl)furfural

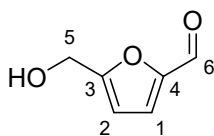

<sup>1</sup>H NMR (500 MHz, d<sub>6</sub>-Acetone) δ 9.55 (s, 1H), 7.38 (d, *J* = 3.5 Hz, 1H), 6.58 (d, *J* = 3.5 Hz, 1H), 4.73 (s, 1H), 4.64 (s, 2H)

<sup>13</sup>C NMR (125 MHz, d<sub>6</sub>-Acetone) δ 178.2, 162.8, 153.3, 124.0, 110.2, 57.4.

UHPLC-HRMS : m/z calculated for C<sub>6</sub>H<sub>7</sub>O<sub>3</sub> [M+H]<sup>+</sup> 127.0317, found 127.0389.

### Levulinic acid

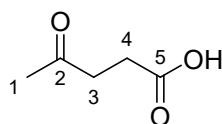

<sup>1</sup>H NMR (500 MHz, d<sub>6</sub>-Acetone) δ 2.73 (t, 2H), 2.50 (t, 2H), 2.12 (s, 3H).

<sup>13</sup>C NMR (125 MHz, d<sub>6</sub>-Acetone) δ 206.9, 174.6, 38.1, 29.6, 28.1.

UHPLC-HRMS: m/z calculated for C<sub>5</sub>H<sub>7</sub>O<sub>3</sub> [M-H]<sup>-</sup> 115.0473, found 115.0389.
